# Supplementary material for: Rapamycin-mediated mTOR inhibition impairs silencing of sex chromosomes and the pachytene piRNA pathway in the mouse testis
Source: Aging (Albany NY). 2019 Jan 13;11(1):185–208. doi: 10.18632/aging.101740 (PMC6339782; doi:10.18632/aging.101740)
Supplement: Supplemental File [file aging-11-101740-s001.pdf]

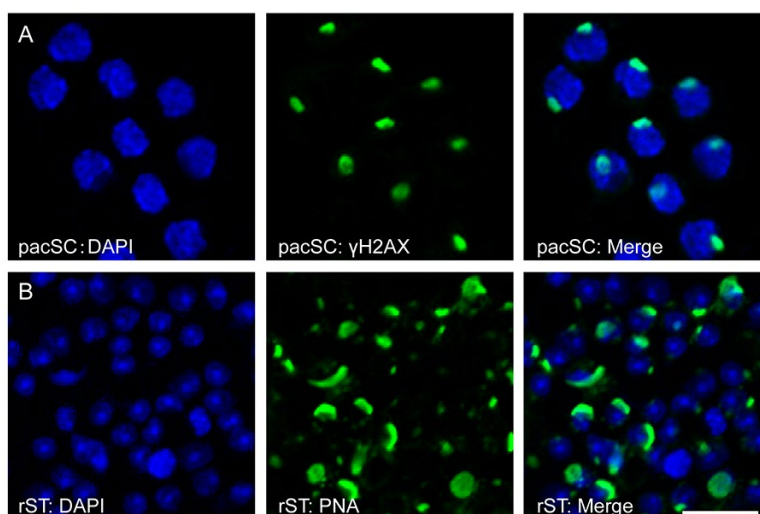

**Supplementary Figure S1. Purities of isolated mouse spermatogenic cells.** Pachytene spermatocytes (pacSC) and round spermatids (rST) were isolated from adult testes by STA-PUT method. Pachytene spermatocytes were immunostained with their specific marker protein  $\gamma$ H2AX, which specifically stains XY body (**a**), and isolated round spermatids were immunostained with PNA for acrosome (**b**).

A

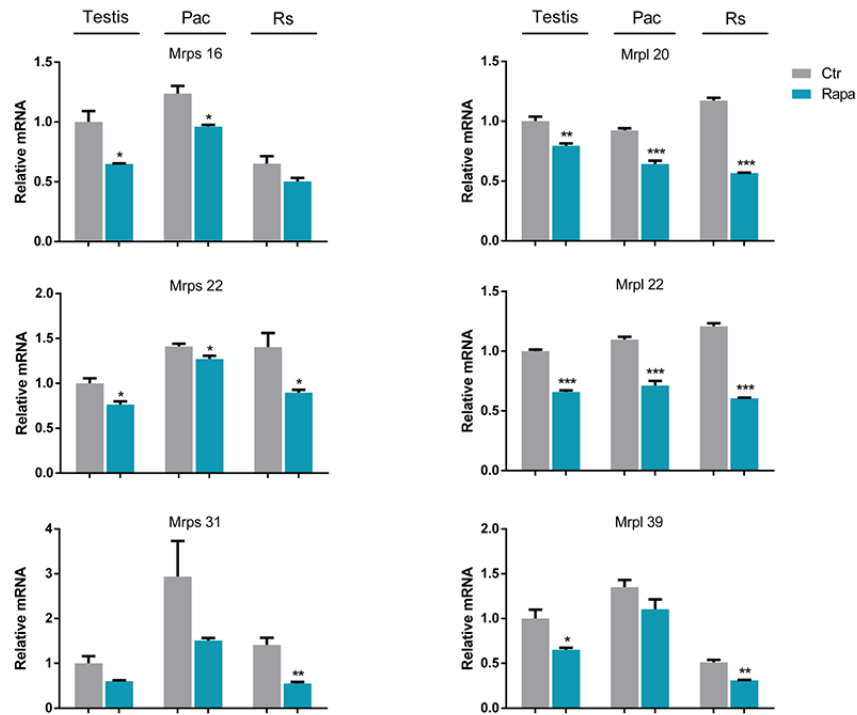

B

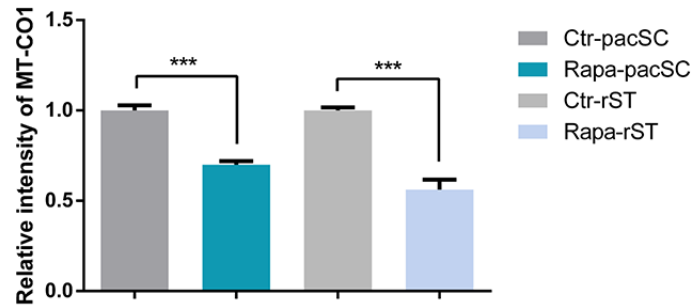

C

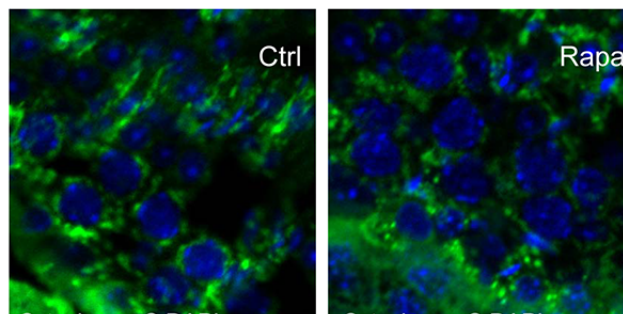

**Supplementary Figure S2. Mitochondrial proteins and genes encoding for mitochondrial ribosome were decreased.** (a) Relative expression levels of genes for mitochondrial ribosome in whole testes and isolated cell populations by quantitative RT-PCR (testes, n=3-4, isolated spermatocytes, n=7-15, \*P<0.05, \*\* P<0.01, \*\*\* P<0.001). (b) Quantification of OXPHOS subunit MT-CO1 in isolated cell populations (Error bars represent SD, \*\*\* P<0.001).

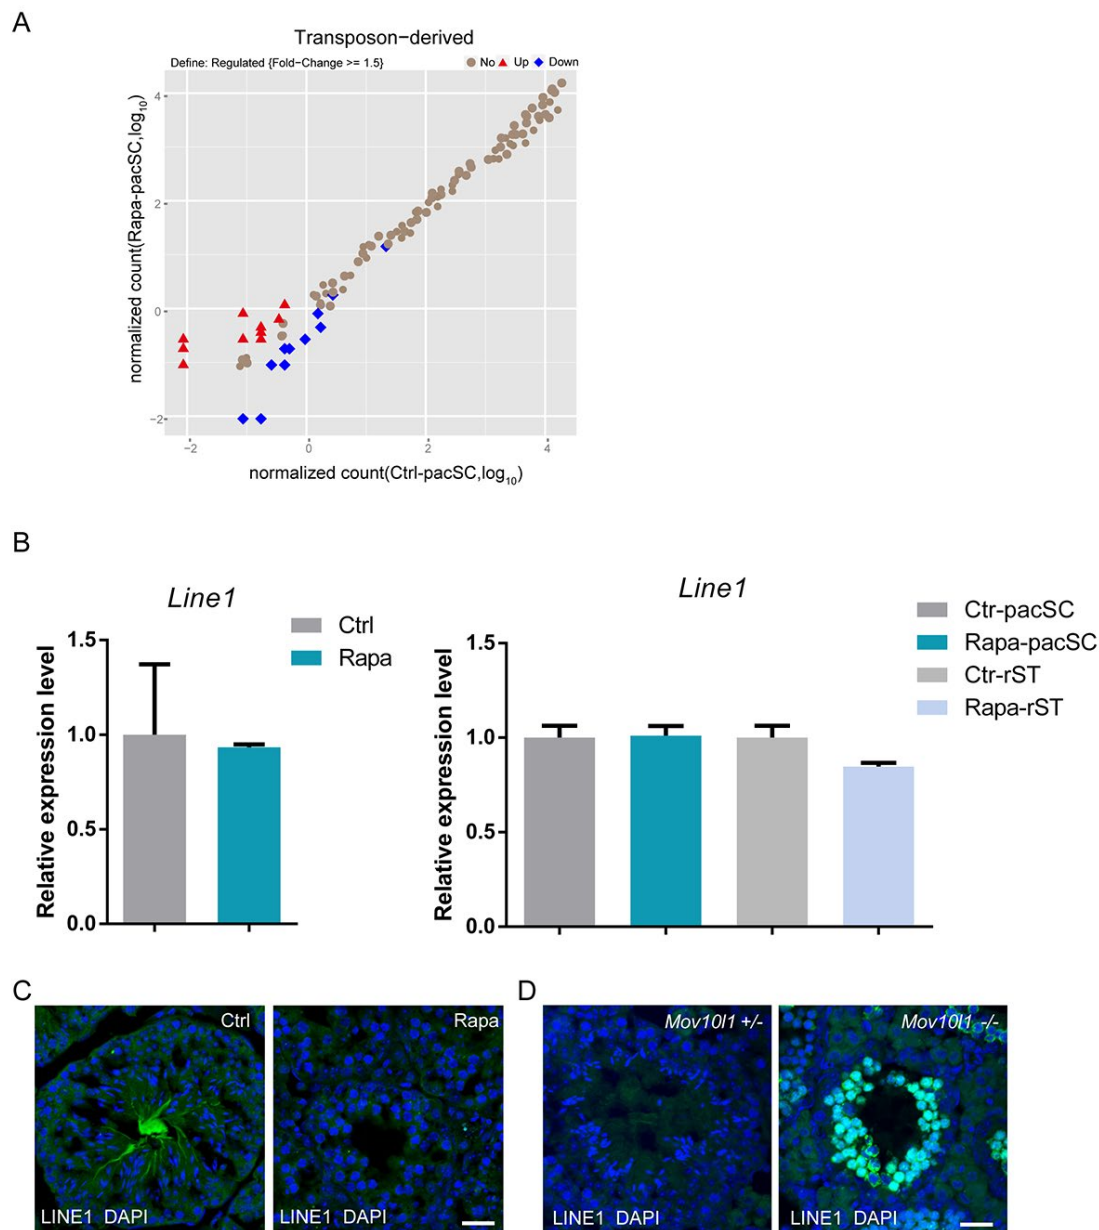

**Supplementary Figure S3. Transposons remained similarly expressed in adult testes and isolated cell populations.**

(a) Small RNA sequence reads (24-32nt) that mapped to the mouse transposons sequence in pachytene spermatocytes from adult rapamycin-treated testes (vertical axis) relative to those from control testes (horizontal axis). (b) Quantitative RT-PCR analysis of Line1 in testes and isolated cell populations. (c) Immunostaining of LINE1 ORF1p (green) on testes sections from adult control and rapamycin-treated mice. (d) Immunostaining of LINE1 ORF1p (green) in wild-type (*Mov10l1*<sup>+/+</sup>) and whole-body *Mov10l1* knockout (*Mov10l1*<sup>-/-</sup>) testes at postnatal day 60. Scale bar, 20  $\mu$ m.

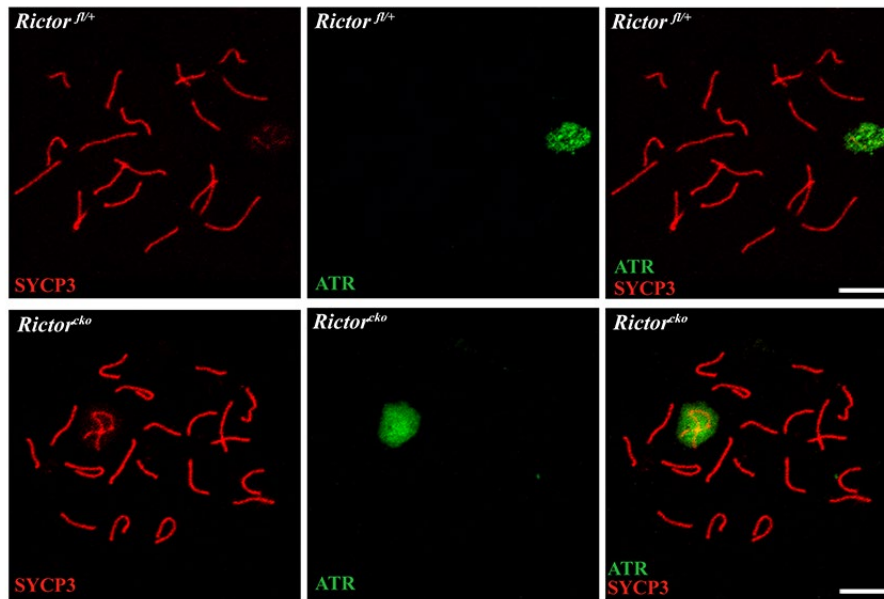

**Supplementary Figure S4. Normal distribution of the sex body silencing factor ATR in pachytene spermatocytes from testis-specific *Rictor* knockout (*Rictor<sup>cko</sup>*) mice.** Spread nuclei of spermatocytes from wild-type and *Rictor<sup>cko</sup>* testes were prepared followed by immunolabeling of ATR (Green) and the synaptonemal complex protein SYCP3 (Red). Wild-type and *Rictor<sup>cko</sup>* mice were at 35-day-old (n=50 for each genotype). Scale bar, 10  $\mu$ m.

**Supplementary Table S1.**

| <b>Antibody Name</b>              | <b>Manufacturer</b>             | <b>Application</b> |
|-----------------------------------|---------------------------------|--------------------|
| Anti-MILI                         | Abcam,ab36764                   | WB                 |
| Anti-MIWI                         | Abcam,ab12337                   | WB                 |
| Anti-TDRD1                        | gift from Dr. Shinichiro Chuma  | WB                 |
| Anti-PLD6                         | gift from Dr. Watanabe Toshiaki | WB                 |
| Anti-FKBP6                        | Abcam,ab108419                  | WB                 |
| Anti-ND2                          | Abcam,ab102753                  | WB                 |
| Anti-Cytochrome b                 | Abcam,ab182330                  | WB                 |
| Anti-ATP6                         | Abcam,ab192423                  | WB                 |
| Anti-MT-CO1                       | Abcam,ab14705                   | WB/IF              |
| Anti-LINE1 ORF1p                  | gift from Dr. Ramesh Pillai     | WB/IF              |
| Anti-phospho-Akt S473             | Cell signaling,4058S            | WB                 |
| Anti-phospho-Akt T308             | Cell signaling,9275S            | WB                 |
| Anti-AKT                          | Cell signaling,9272S            | WB                 |
| Anti-phospho-S6 ribosomal protein | Cell signaling,2215S            | WB                 |
| Anti-S6 ribosomal protein         | Cell signaling,2217S            | WB                 |
| Anti-p-4EBP1 S65                  | Cell signaling,9451S            | WB                 |
| Anti-phospho-NDRG1 T346           | Cell signaling,3217S            | WB                 |
| Anti-mTOR                         | Cell signaling,2972S            | WB                 |
| Anti-Raptor                       | Cell signaling,2280S            | WB                 |
| Anti-Rictor                       | Cell signaling,2140S            | WB                 |
| Anti-COXIV                        | Cell signaling,4850S            | WB                 |
| Anti-phospho-PKCa                 | Santa Cruz,sc12356-R            | WB                 |
| Anti-β-Actin                      | Sigma, A5316                    | WB                 |
| Anti-MILI                         | gift from Dr. Ramesh Pillai     | IF                 |
| Anti-MIWI                         | gift from Dr. Ramesh Pillai     | IF                 |
| Anti-Cytochrome C                 | Abcam, ab110325                 | IF                 |
| Anti-γH2AX                        | Millipore, 16-202A              | IF/Spread          |
| Anti-SYCP1                        | Abcam, ab15090                  | Spread             |
| Anti-SYCP3                        | Abcam, ab97672                  | Spread             |
| Anti-ATR                          | Santa Cruz, sc1887              | Spread             |
| Anti-Rad51                        | Santa Cruz, sc8349              | Spread             |
| Anti-MLH1                         | BD,550838                       | Spread             |
| Anti-H3K9me3                      | Abcam, ab8898                   | Spread             |
